# Supplementary material for: Long-Term Treatment with Gadopentetic Acid or Gadodiamide Increases TRPC5 Expression and Decreases Adriamycin Nuclear Accumulation in Breast Cancer Cells
Source: MDPI journal article supplement (doi:10.3390/cells12091304), 2023-05-03
Supplement: s1 [file s1]

## Supplementary figures

A

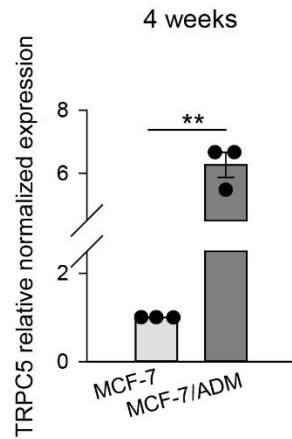

**Figure S1.** qRT-PCR analysis showed that TRPC5 expression was greater in MCF-7/ADM compared to MCF-7 cells.  $**P < 0.01$ .

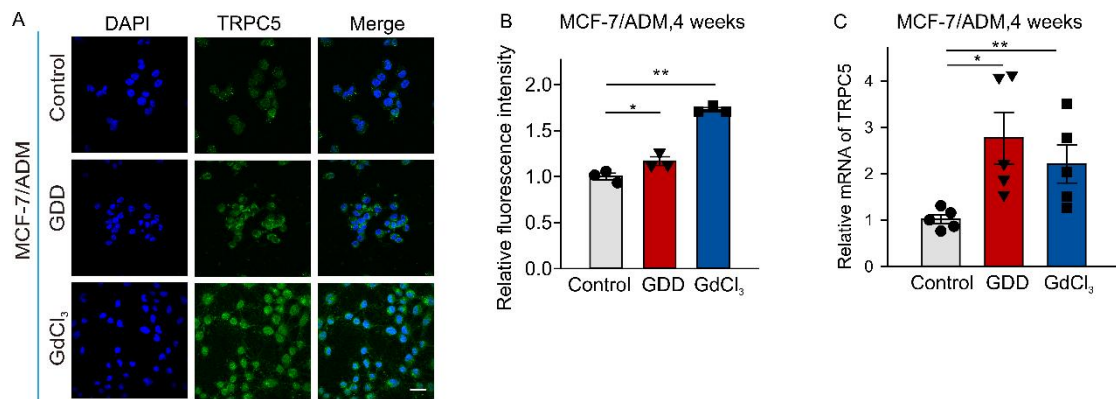

**Figure S2.** TRPC5 expression was greater in MCF-7/ADM treated with GDD and GdCl<sub>3</sub> for 4 weeks. **A and B** Representative images of immunostaining with TRPC5 and summary data (n=4) in MCF-7/ADM cells (TRPC5, green fluorescence). **C** qRT-PCR analysis of TRPC5 expression in MCF-7/ADM cells (n=5). The One-way ANOVA test followed by the Student-Newman-Keuls post hoc all pair-wise multiple comparison test was used to compare the treatment groups with the control group. All values are mean  $\pm$  SEMs.  $*P < 0.05$ ,  $**P < 0.01$ . The scale bar indicates 30  $\mu$ m.

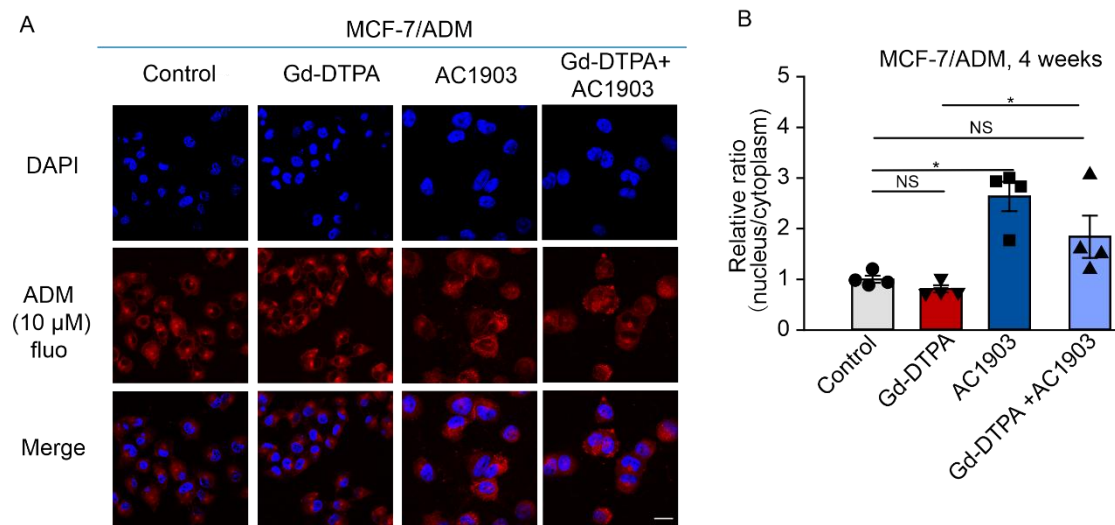

**Figure S3.** Downregulation of TRPC5 expression resulted in a decreased efflux of ADM in MCF-7/ADM cells. **A** Nuclear ADM accumulation in MCF-7/ADM cells. Representative confocal micrographs of MCF-7/ADM cells are shown. ADM exhibits red autofluorescence. The scale bar indicates 30  $\mu$ m. **B** Summary data of ADM accumulation in MCF-7/ADM cells (n=4). The One-way ANOVA test followed by the Student-Newman-Keuls post hoc all pair-wise multiple comparison test was used to compare the treatment groups with the control group. All values are mean  $\pm$  SEMs. \* $P$  < 0.05, \*\* $P$  < 0.01. “NS” stands for no significant difference.
